# Supplementary material for: Tracking in atomic detail the functional specializations in viral RecA helicases that occur during evolution
Source: PubMed Central journal article supplement (PMC3814363; doi:10.1093/nar/gkt713), 2013-08-10
Supplement: supp_gkt713_nar-01566-h-2013-File010.pdf [file supp_gkt713_nar-01566-h-2013-File010.pdf]

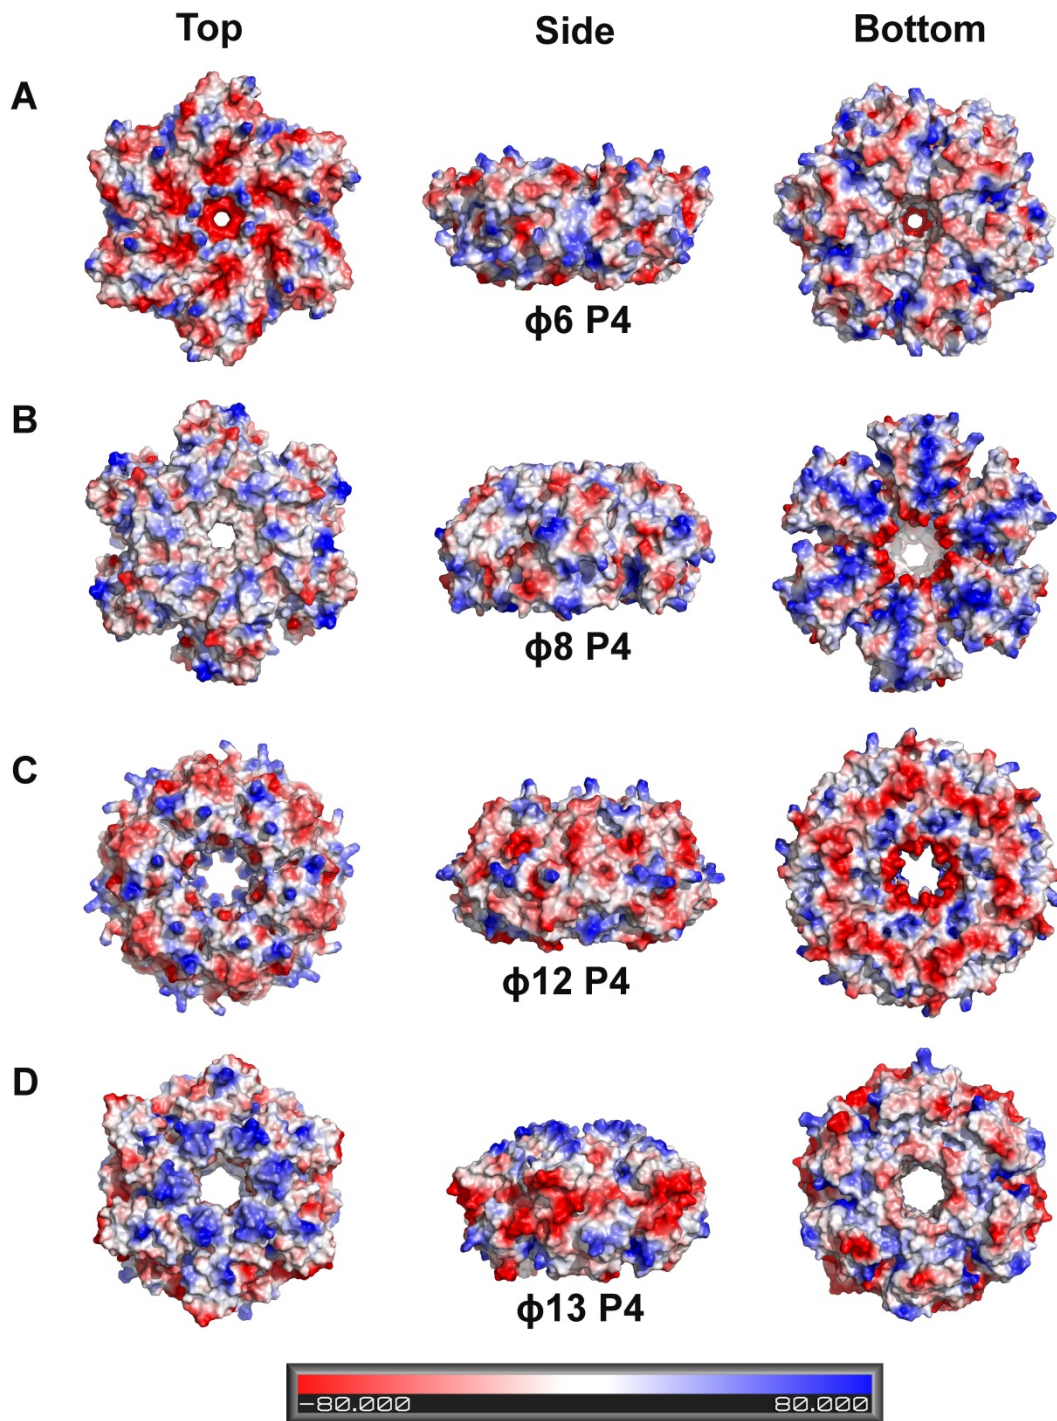

**Figure S1**

**Supplementary figure S1:** Overall electrostatic charge distribution on hexameric P4 proteins:  $\phi 6$  (A),  $\phi 8$  (B) and  $\phi 12$  (C) and  $\phi 13$  (D). From left to right are represented the top, side and bottom view.

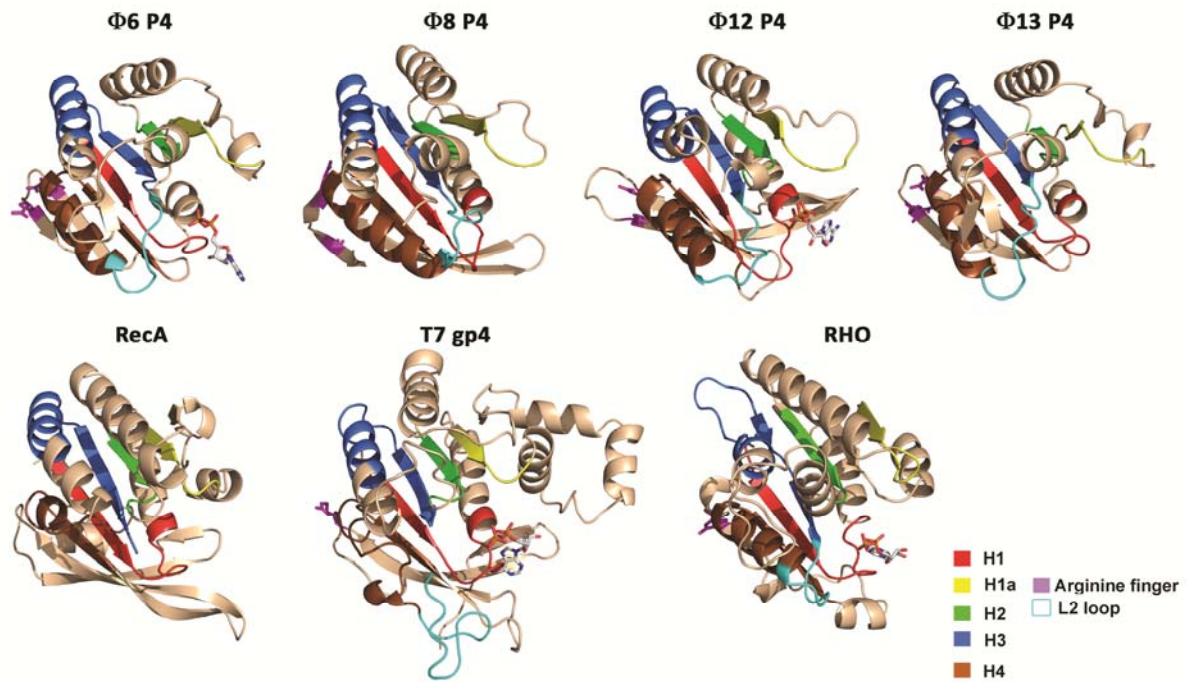

**Figure S2**

**Supplementary figure S2:** Structural superimposition of the core ATPase domain of P4 proteins and structurally related proteins: *E.Coli* RecA (RecA) (PDB 2REB), T7 gp4 helicase (T7gp4) (PDB 1CR1), and *E.Coli* Rho helicase (RHO) (PDB 3ICE). The colour scheme for conserved motifs (H1-H4) is the same used in sequence alignment in Figure 3.

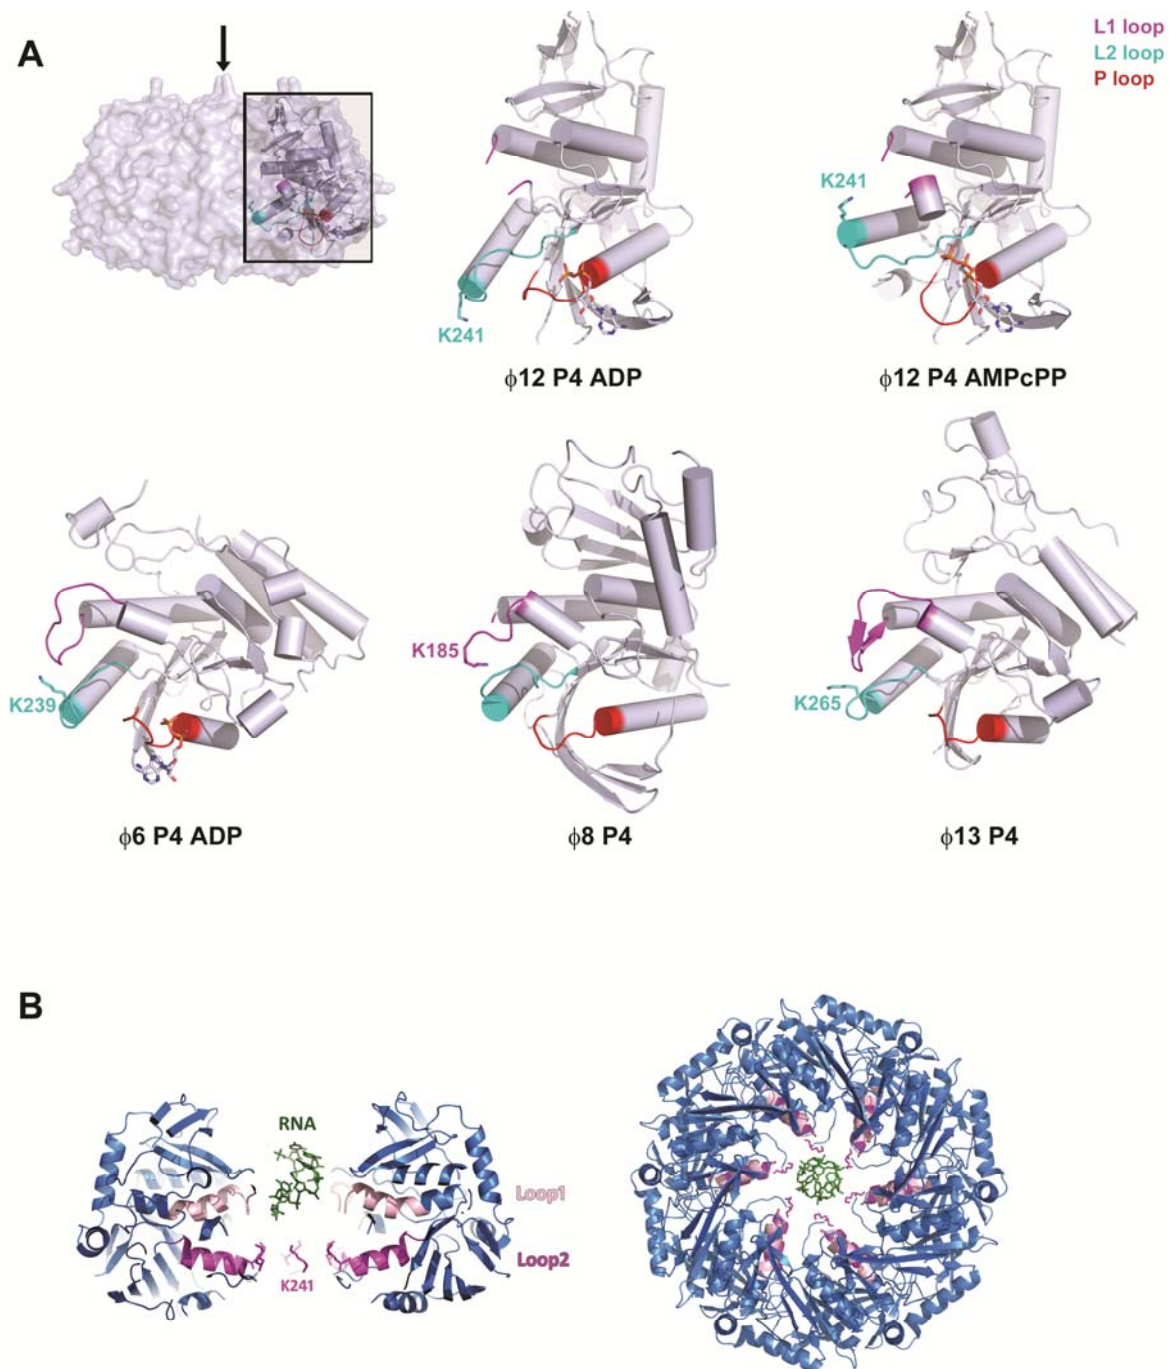

**Figure S3**

**Supplementary figure S3:** (A) The central L1 and L2 loops. Structures of monomeric P4 proteins are drawn in the same orientation. The lysines involved in RNA binding are depicted in sticks. The L1, L2 and P-loop are coloured in pink, cyan and red respectively. (B): Model for RNA binding. Plausible model for RNA binding within the hexamer based on fitting of the “staircase” RNA structure from *E.Coli* Rho (PDB 3ICE) into the central channel of the  $\Phi$ 12 P4 hexamer. Left, side view with only two subunits shown for clarity and loops L1, L2 highlighted in light pink and magenta. Right, top view showing the position of the RNA in the P4 hexamer.

| Mutation      | Mutagenic oligonucleotide                                                                                                                                                                               | Plasmid |
|---------------|---------------------------------------------------------------------------------------------------------------------------------------------------------------------------------------------------------|---------|
| TTS202-204LKK | <sup>1</sup> 5'- GGAGTGACATATGATCCATCTGTACGA - 3'<br><sup>2</sup> 5'- CGTAACCTTAAGGGTATTTCTCGT - 3'<br><sup>3</sup> 5'- CTCGGCTTAAGATTACCACCAGC - 3'<br><sup>4</sup> 5'- CTCGAATTCTCAGTTGGAGGTGAGA - 3' | pDK27   |
| ΔTTS202-204   | 5'- GCAGCTGGTGGTAATGGTGGTATTTCTCGTGGC - 3'<br>5'- GCCACGAGAAATACCACCATTACCACCAGCTGC - 3'                                                                                                                | pDK49   |
| S252Q         | 5'- CAAGGAAGCGAGCCGCCAGAACAGCACGTCTCTC - 3'<br>5'- GAGAGACGTGCTGTTCTGGCGGCTCGCTTCCTTG - 3'                                                                                                              | pDK33   |
| R272A         | 5'- GCAAGTACTGACAGCTACCGGTGAAGGTCTGC - 3'<br>5'- GCAGACCTTCACCGGTAGCTGTCTCAGTACTTGC - 3'                                                                                                                | pDK35   |
| Q278A         | 5'- CGGTGAAGGTCTGGCACGCCTGACACACTC - 3'<br>5'- GAGTGTGTGTCAGGCGTGCCAGACCTTCACCG - 3'                                                                                                                    | pDK30   |
| Y288A         | 5'- CACACTCTGCAGACGAGTGCCGGCGAGCATTCGGTCCTCACC<br>- 3'<br>5'- GGTGAGGACCGAATGCTCGCCGGCACTCGTCTGCAGAGTGTGTG<br>- 3'                                                                                      | pDK29   |
| S292A         | 5'- GTTATGGCGAGCATGCGGTCCTCACCATCCAC - 3'<br>5'- GTGGATGGTGAGGACCGCATGCTCGCCATAAC - 3'                                                                                                                  | pDK31   |

**Supplementary table S1.** Primers used for mutagenesis.

| Data collection                                   | $\phi 6$ P4                                                                 | $\phi 8$ P4             | $\phi 8$ P4His          | $\phi 8$ P4 $\Delta$ 281        | $\phi 12$ P4 UTP                | $\phi 12$ P4-Q278A              | $\phi 12$ P4-S292A              | $\phi 13$ P4                   |
|---------------------------------------------------|-----------------------------------------------------------------------------|-------------------------|-------------------------|---------------------------------|---------------------------------|---------------------------------|---------------------------------|--------------------------------|
| Beamline                                          | SRS 14.2                                                                    | ESRF ID29               | DLS IO2                 | ESRF ID14-EH4                   | SRS 14.2                        | ESRF ID14-EH4                   | ESRF ID14-EH4                   | ESRF ID14-EH2                  |
| Space group                                       | P1                                                                          | P622                    | R32                     | P21212                          | I222                            | I222                            | I222                            | P212121                        |
| Unit cell (Å, °)                                  | a=93.8, b=95.3,<br>c=98.3, $\alpha$ =82.5,<br>$\beta$ =86.2, $\gamma$ =64.8 | a=b=100.7,<br>c=65.7    | a=b=197.7,<br>c=562.6   | a=138.9,<br>b=159.6,<br>c=100.3 | a=105.4,<br>b=129.3,<br>c=159.1 | a=105.6,<br>b=132.3,<br>c=159.9 | a=104.4,<br>b=131.7,<br>c=159.3 | a=97.2,<br>b=116.2,<br>c=149.8 |
| Wavelength (Å)                                    | 0.8701                                                                      | 0.9771                  | 0.9798                  | 1.0056                          | 0.9755                          | 0.9756                          | 0.9759                          | 0.933                          |
| Resolution (Å)                                    | 20.0-2.8 (2.90-<br>2.80)                                                    | 50.0-2.0<br>(2.07-2.00) | 50.0-3.1<br>(3.21-3.10) | 72.5-2.8<br>(2.85-2.78)         | 20.0-1.9<br>(1.97-1.90)         | 20.0-2.6<br>(2.69-2.60)         | 50.0-2.4<br>(2.49-2.40)         | 50.0-1.7<br>(1.76-1.70)        |
| Completeness (%)                                  | 97.0 (88.2)                                                                 | 99.8 (100)              | 100 (99.8)              | 99.9 (99.9)                     | 100.0 (99.8)                    | 94.6 (93.4)                     | 93.1 (70.7)                     | 99.3 (99.5)                    |
| Redundancy                                        | 3.0 (2.6)                                                                   | 39.4 (32)               | 12.7 (11.1)             | 11.6 (11.9)                     | 7.2 (5.8)                       | 6.6 (4.8)                       | 9.6 (6.2)                       | 4.3 (4.3)                      |
| I/ $\sigma$ (I)                                   | 8.3 (1.5)                                                                   | 101.8 (20.8)            | 8.6 (1.3)               | 14.6 (3.3)                      | 29.4 (4.9)                      | 7.1 (7.1)                       | 17.6 (4.2)                      | 19.5 (2.4)                     |
| Rmerge (%)                                        | 18.6 (85.9)                                                                 | 9.7 (37.3)              | 0.31 (100)              | 12.7 (88.5)                     | 7.7 (38.1)                      | 15.1 (28.5)                     | 10.6 (29.2)                     | 7.0 (65.5)                     |
| <b>Refinement</b>                                 |                                                                             |                         |                         |                                 |                                 |                                 |                                 |                                |
| Resolution (Å)                                    | 19.9/2.8                                                                    |                         | 45.0-3.1                | 50.0-2.8                        | 20.0-1.9                        | 50.0-2.6                        | 20.0-2.4                        | 19.8-1.7                       |
| Rwork/Rfree (%)                                   | 21.7/24.4                                                                   |                         | 29.6/30.9               | 21.4/22.9                       | 19.4/20.4                       | 25.6/27.4                       | 26.3/28.9                       | 16.4/18.8                      |
| Rmsd bond (Å)                                     | 0.009                                                                       |                         | 0.008                   | 0.008                           | 0.004                           | 0.005                           | 0.004                           | 0.012                          |
| Rmsd angle (°)                                    | 1.05                                                                        |                         | 1.05                    | 1.01                            | 1.01                            | 1.02                            | 0.94                            | 1.1                            |
| Mean B-factor/Wilson plot (Å <sup>2</sup> )       | 57/51                                                                       |                         | 67/68                   | 58/68                           | 26/18                           | 43/46                           | 39/31                           | 22/17                          |
| Ramachandran plot (%)<br>favored/allowed/outliers | 97.7/100/0                                                                  |                         | 94/100/1                | 97.8/100/0                      | 99.5/100/0                      | 97.9/100/0                      | 98.7/100/0                      | 98.7/100/0                     |

**Supplementary table S2.** Data collection and refinement statistics.

|                                                      | <b>φ6 P4</b> | <b>φ8 P4</b> | <b>φ12 P4</b> | <b>φ13 P4</b> |
|------------------------------------------------------|--------------|--------------|---------------|---------------|
| <b>Subunit interface (Å<sup>2</sup>)</b>             | 1826         | 1605         | 1938          | 1530          |
| <b>Number of Hydrogen bonds</b>                      | 24           | 19           | 26            | 16            |
| <b>Number of Salt bridges</b>                        | 6            | 3            | 8             | 7             |
| <b>Number of residues with a Buried area &gt;30%</b> | 73           | 68           | 84            | 70            |

**Supplementary table S3.** Subunit interface interactions determined by PISA (41).
